# Supplementary material
Source: PubMed Central journal article supplement (PMC3067433)
Supplement: supp_77_7_2392__1.pdf [file supp_77_7_2392__1.pdf]

Table 1. Sequences of the primers used in this study

| Primer     | Sequence                                                                                                                           |
|------------|------------------------------------------------------------------------------------------------------------------------------------|
| chiAF1     | 5'-ACGAACCTTATTCTTCTGCATAC-3'                                                                                                      |
| chiAR1     | 5'-GTGCTCGGGAACACTAGTACAACACCCCTTGAGCTTTG-3'                                                                                       |
| chiAF2     | 5'-GGGGTGTGTACTAGTTTCCCGAGCACTTCTTCGCCC-3'                                                                                         |
| chiAR2     | 5'-GGTCAAACCTGGAACCTGCAACTGCC-3'                                                                                                   |
| trpEF      | 5'-AGTCTCTAGACCGCAACGGCGATTTTGCTCACCC-3'                                                                                           |
| trpER      | 5'-GACTACTAGTTCATTCCCTCACCCCAAGCG-3'                                                                                               |
| CsgF       | 5'-GAAAGCGAAAAGTATTTAAACCCCAAGTGGCCAGATAGGTATGACAACACTTAGTAGGGGCTA<br>AAGCCCCAACACCCAAGGAGGTGTTGTGGACTTCCCGAGCACTTCTTCGCCCCAT-3'   |
| CsgR       | 5'-AGACCCTTTCAGCGGCCAAAAAAGCTCGCTGATTGCCGTAAAAATGAAAAGAAGGCTTAACC<br>TAATGCCTACACATAATTGCCTTTTGGCCGATATCATTCCTCACCCCAAGCGCCTTC-3'  |
| SigF       | 5'-TTGCTGGCGCGCTCTTTGCAGTCCCTGCAAGTGCCTTCCCGAGCACTTCTTCGCCCCA-3'                                                                   |
| SigR       | 5'-CACTATAGACAGCACAGGGCAATTGATTTCTTCATTCACACACCTCCTTGGGTG-3'                                                                       |
| chiANF     | 5'-AGAGAGGTACAGGGCGTTGACCGAGT-3'                                                                                                   |
| chiACR     | 5'-GGGCAGGATAGAGATGCCTGAAGAG-3'                                                                                                    |
| 1675F1-X   | 5'-TTCTCTCTAGAGTTC AACAGCTAGGGGATTAATATCAACC-3'                                                                                    |
| 1675R1-B   | 5'-AGTGTGGATCCTCAGCCCAGGGCGGCTGGACGGCAAGGG-3'                                                                                      |
| 1675F2     | 5'-ATGAAGAAATCAATTGCCCTGGTGTCTATAGTG-3'                                                                                            |
| 1675R2     | 5'-CTATAGACACCTCCGTTCTAAAGTGTGC-3'                                                                                                 |
| 0895PF     | 5'-CGGCAAAGGCGAATTATGTGTAGG-3'                                                                                                     |
| 0895PR     | 5'-ATGACAACACCTCCTTGGGTGTG-3'                                                                                                      |
| 1675PI     | 5'-CCGCCTCTCCCCGCGGTTGGCCGATTC-3'                                                                                                  |
| 1675F3     | 5'-CGCATCAACGACCCCTGCACTCAAGGTGGC-3'                                                                                               |
| 1675R3     | 5'-GGTTCCATGGCCGTTCTGGTCCGCAC-3'                                                                                                   |
| 1689F1-B   | 5'-TTACTGGATCCATCTCTGGTTAATTGTAATTCGAACTTTC-3'                                                                                     |
| 1689R1-E   | 5'-GCTTGGAAATCCGGTTATGACGTCGTAC-3'                                                                                                 |
| 1689F2-csg | 5'-GAAAGCGAAAAGTATTTAAACCCCAAGTGGCCAGATAGGTATGACAACACTTAGTAGGGGCTA<br>AAGCCCCAACACCCAAGGAGGTGTTGTGGAATGAAGAAGTTTGGAGCGGTAGTGC-3'   |
| 1689R2-csg | 5'-AGACCCTTTCAGCGGCCAAAAAAGCTCGCTGATTGCCGTAAAAATGAAAAGAAGGCTTAACC<br>TAATGCCTACACATAATTGCCTTTTGGCCGATATGTGACACCTCCATATCTCGGATGC-3' |
| 1689F3     | 5'-GACTGAGAATCACTGGAAAACAGGAAGC-3'                                                                                                 |
| 1689R3     | 5'-CGTAGTCCTCCTGGATGAACTGGACACC-3'                                                                                                 |
